# Supplementary material
Source: Springer Nature journal article supplement (https://www.springermedizin.de/resource/supplementary/12882_2013_809_MOESM11_ESM.pdf/9454356)
Supplement: MOESM11 [file 9454356]

Patients in the *MarketScan® Commercial and Medicare Databases* with  $\geq 1$  dialysis claim from January 1, 2007 to March 31, 2012

**N = 177,327 (100%)**

$\geq 3$  consecutive calendar months with  $\geq 1$  dialysis claim. *Index date* = 1<sup>st</sup> dialysis event in the 1<sup>st</sup> month of  $\geq 3$  consecutive months of dialysis events.

**N = 98,185 (55.4%)**

$\geq 90$  days of post-index continuous enrollment

**N = 93,166 (52.5%)**

$\geq 18$  years old on the index date

**N = 92,617 (52.2%)**

$\geq 180$  days of pre-index continuous enrollment

**N = 54,125 (30.5%)**

Did not have a kidney transplant, cancer, hematological condition, or blood dyscrasia during the pre-index period

**N = 47,236 (26.6%)**

$\geq 1$  dialysis claim in  $\geq 70\%$  of calendar months after the index date

**N = 42,790 (24.1%)**

Commercial insurance at index

**N = 24,325 (56.8%)**

Medicare at index

**N = 18,465 (43.2%)**

$\geq 1$ RBC transfusion during follow-up

**N = 8,646 (35.5%)**

$\geq 1$  RBC transfusion during follow-up

**N = 5,305 (28.7%)**
